# Supplementary material for: BDH1-mediated βOHB metabolism ameliorates diabetic kidney disease by activation of NRF2-mediated antioxidative pathway
Source: PubMed Central journal article supplement (PMC11622694; doi:10.18632/aging.205248), 2023-11-27
Supplement: aging-15-205248-s001.pdf [file aging-15-205248-s001.pdf]

SUPPLEMENTARY FIGURES

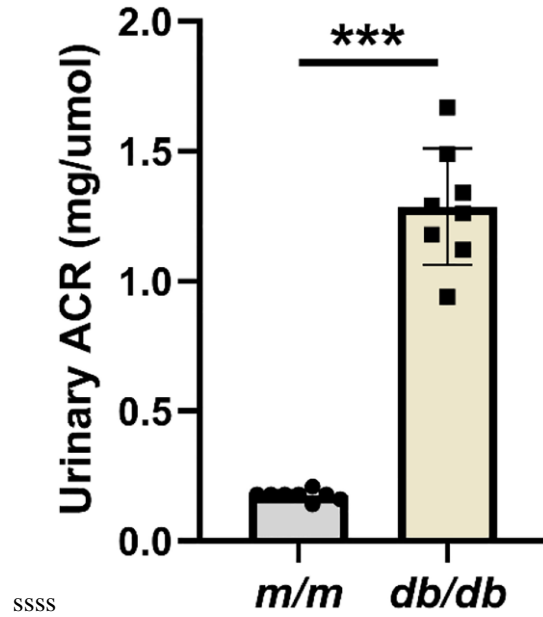

Supplementary Figure 1. Urinary ACR in *m/m* and *db/db* group (*n* = 8 in per group). Abbreviation: ACR: albumin-to-creatinine ratio. \*\*\**P* < 0.001.

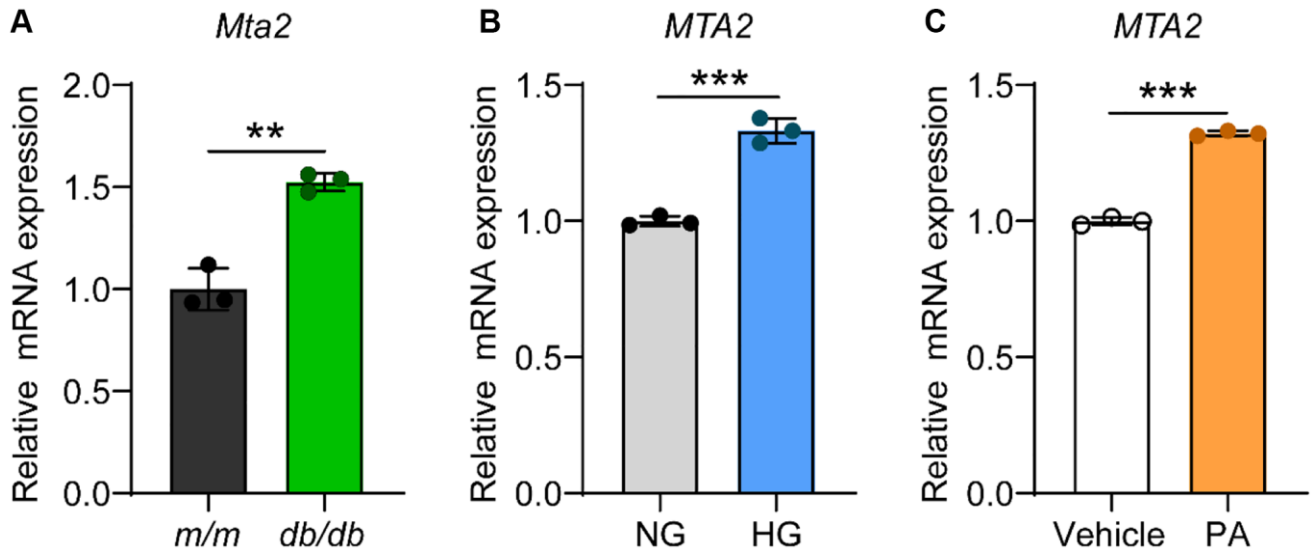

Supplementary Figure 2. qRT-PCR analysis showing the mRNA level of *Mta2* in the kidneys (A) of *m/m* and *db/db* mice (*n* = 3 per group) and HK-2 cells treated with HG (B) or PA (C). All results are representative of three independent experiments. Values are presented as mean ± standard deviation. \*\**P* < 0.01; \*\*\**P* < 0.001.

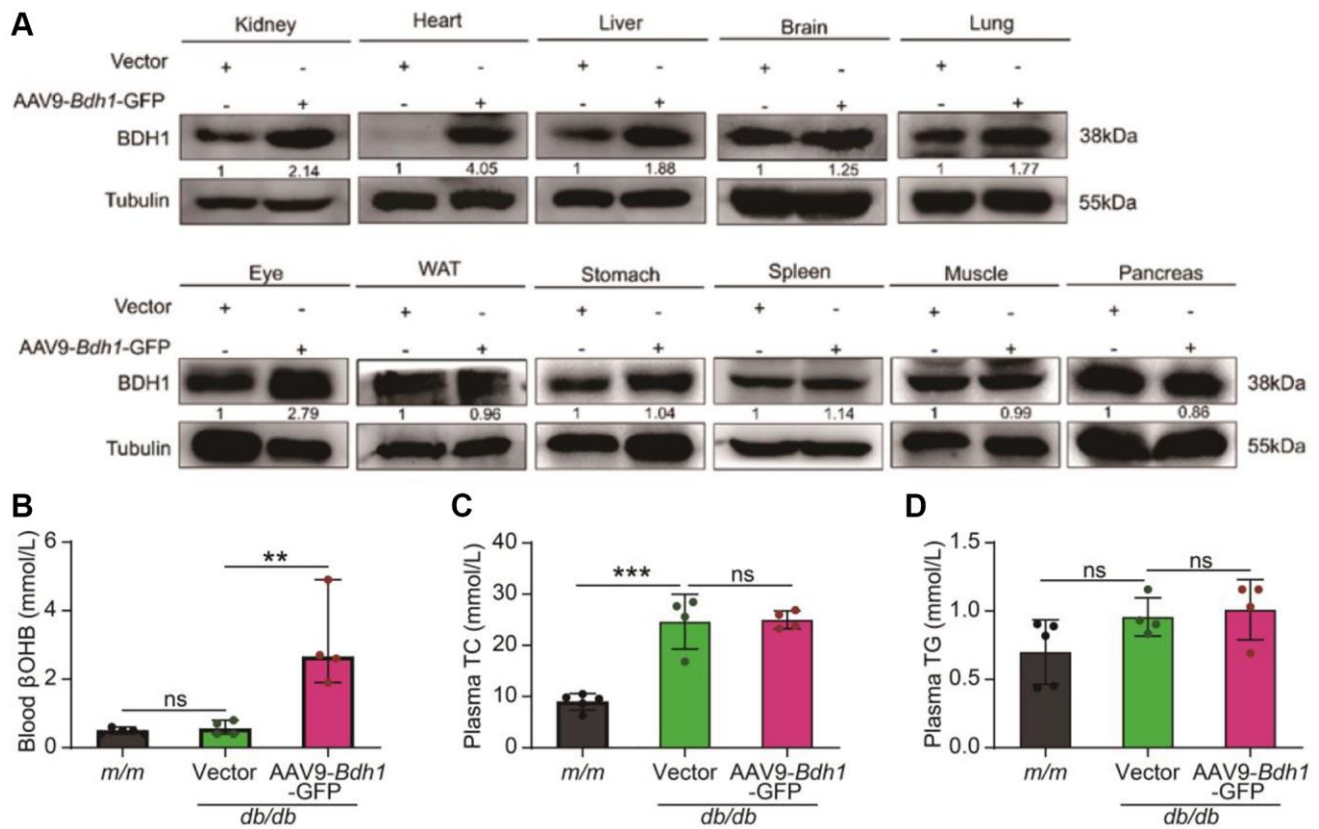

**Supplementary Figure 3.** (A) BDH1 protein expression levels after AAV9-Bdh1-GFP injection in all major organs in the mice body were detected. (B) Blood level of  $\beta$ OHB in mice from the indicated groups ( $n = 5$  in *m/m* group,  $n = 4$  in vector, and AAV-Bdh1-GFP injected *db/db* group). (C) Plasma TC in mice from the indicated groups ( $n = 5$  in *m/m* group,  $n = 4$  in vector, and AAV-Bdh1-GFP injected *db/db* group). (D) Plasma TG in mice from the indicated groups ( $n = 5$  in *m/m* group,  $n = 4$  in vector, and AAV-Bdh1-GFP injected *db/db* group). Abbreviations: BDH1:  $\beta$ -hydroxybutyrate dehydrogenase 1; TC: total cholesterol; TG: total triglyceride. \*\* $P < 0.01$ ; \*\*\* $P < 0.001$ ; Abbreviation: ns: no significance.

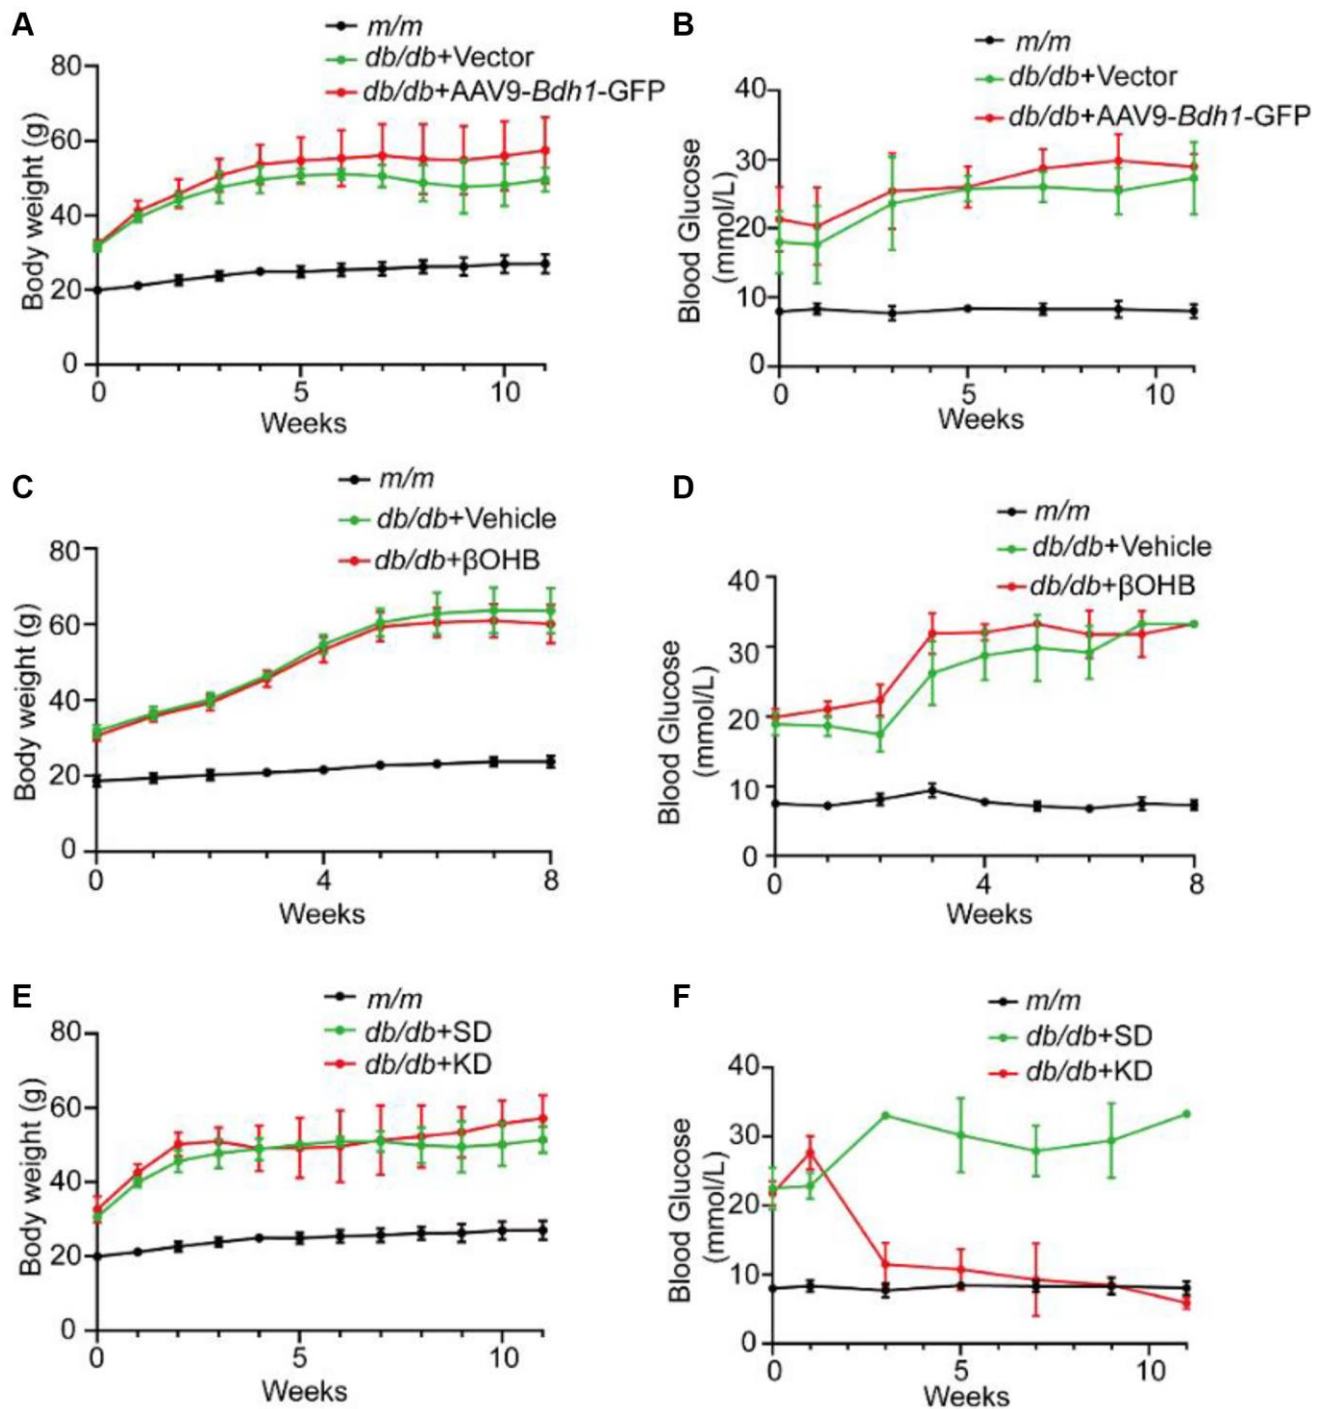

**Supplementary Figure 4.** Body weight (A) and fasted blood glucose (B) of mice in the indicated groups ( $n = 5$  in *m/m* group,  $n = 4$  in vector, and AAV-*Bdh1*-GFP injected *db/db* group). Body weight (C) and fasted blood glucose (D) of mice in the indicated groups ( $n = 5$  per group). Body weight (E) and fasted blood glucose (F) of mice in the indicated groups ( $n = 5$  in *m/m* group;  $n = 4$  in SD and KD groups).

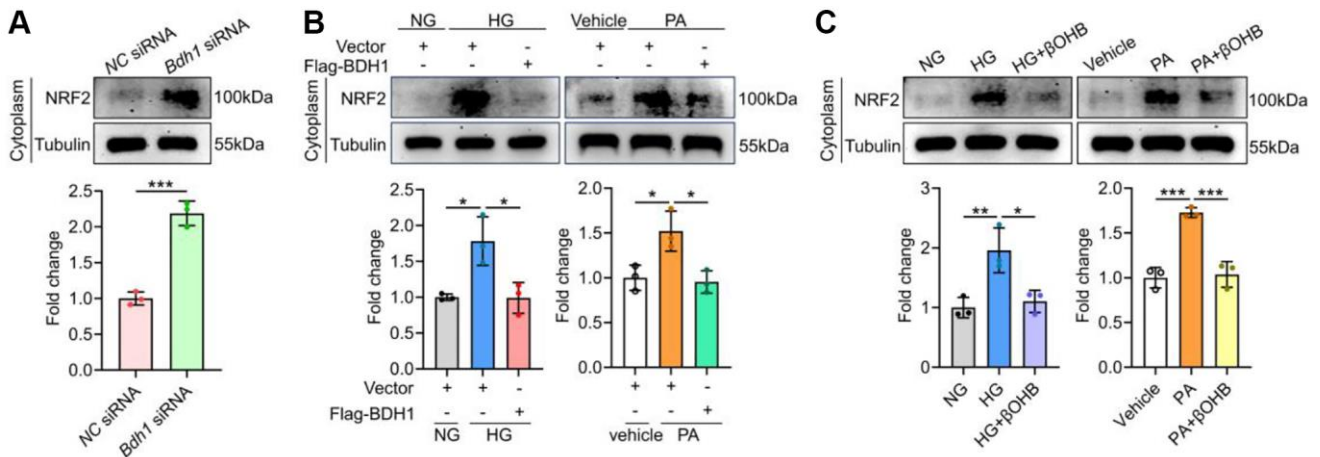

**Supplementary Figure 5.** (A) Representative WB image showing the protein level of NRF2 protein in the cytoplasm of HK-2 cells transfected with NC siRNA or *Bdh1* siRNA. (B) Representative WB images showing the protein level of NRF2 in the cytoplasm of BDH1-overexpressed HK-2 cells treated with HG or PA. (C) Representative WB images showing the protein level of NRF2 in the cytoplasm of  $\beta$ OHB-supplemented HK-2 cells treated with HG or PA. All results are representative of three independent experiments. Values are presented as mean  $\pm$  standard deviation. Abbreviations: BDH1:  $\beta$ -hydroxybutyrate dehydrogenase 1;  $\beta$ OHB:  $\beta$ -hydroxybutyrate; WB: western blot; HG: high glucose; PA: palmitic acid. \* $P < 0.05$ ; \*\* $P < 0.01$ ; \*\*\* $P < 0.001$ .

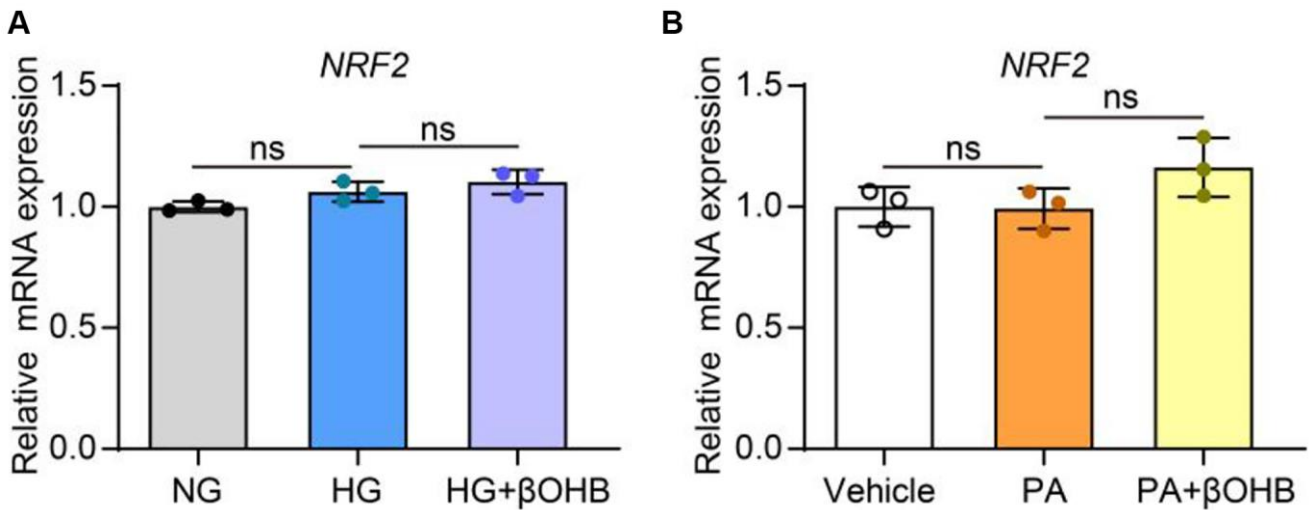

**Supplementary Figure 6.** qRT-PCR analysis showing the *NRF2* mRNA levels of  $\beta$ OHB-supplemented HK-2 cells treated with HG (A) or PA (B). All results are representative of three independent experiments. Values are presented as mean  $\pm$  standard deviation. Abbreviation: ns: no significance.

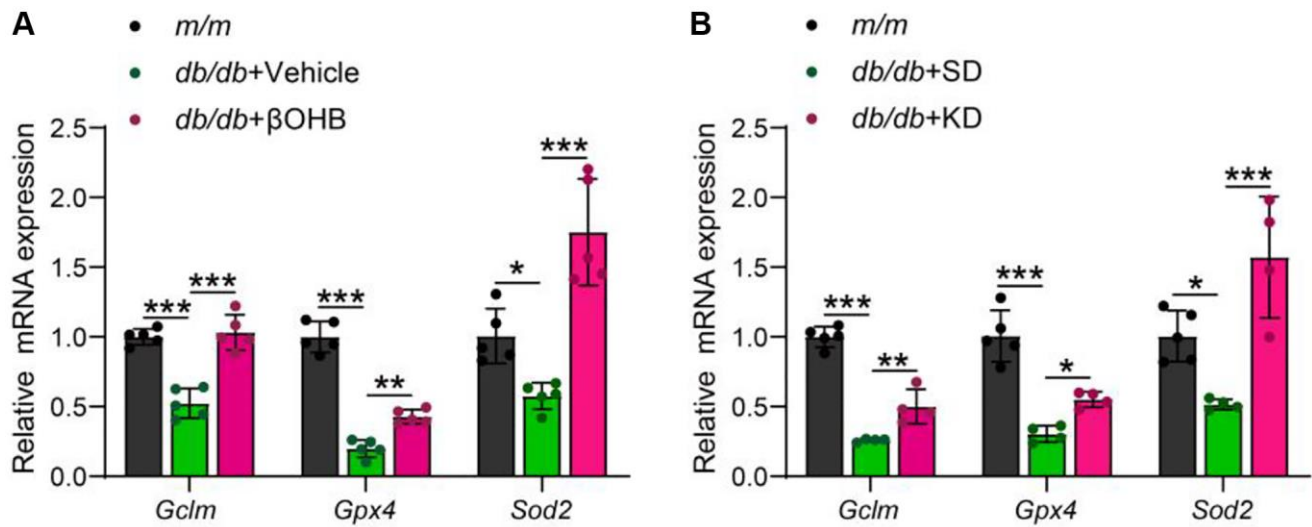

**Supplementary Figure 7. qRT-PCR analysis showing the mRNA levels of *Gclm*, *Gpx4*, and *Sod2* in mice kidneys.** (A) The mRNA levels of *Gclm*, *Gpx4*, and *Sod2* in the kidneys of *m/m* group ( $n = 5$ ), *db/db* + Vehicle ( $n = 4$ ), and *db/db* + βOHB group ( $n = 4$ ). (B) The mRNA levels of *Gclm*, *Gpx4*, and *Sod2* in the kidneys of *m/m* group ( $n = 5$ ), *db/db* + SD ( $n = 4$ ), and *db/db* + KD group ( $n = 4$ ). All results are representative of three independent experiments. Values are presented as mean ± standard deviation. Abbreviations: βOHB: β-hydroxybutyrate; SD: standard diet; KD: ketogenic diet. \* $P < 0.05$ ; \*\* $P < 0.01$ ; \*\*\* $P < 0.001$ .

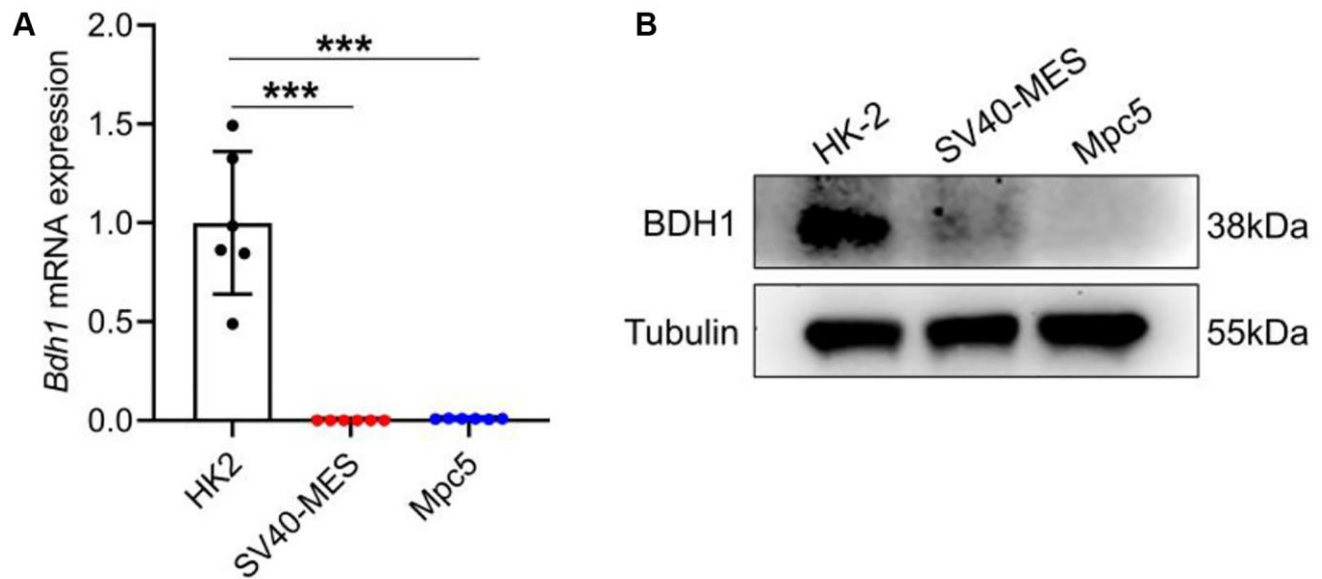

**Supplementary Figure 8. (A)** qRT-PCR analysis showing the mRNA level of *Bdh1* in HK-2 cells, SV40-MES cells, and Mpc5 cells. **(B)** WB analysis showing the protein level of BDH1 in HK-2 cells, SV40-MES cells, and Mpc5 cells. \*\*\* $P < 0.001$ .
